# Supplementary material for: Steatosis grading consistency between controlled attenuation parameter and MRI-PDFF in monitoring metabolic associated fatty liver disease
Source: PubMed Central journal article supplement — Ther Adv Chronic Dis. 2021 Aug 12;12:20406223211033119. doi: 10.1177/20406223211033119 (PMC8366131; doi:10.1177/20406223211033119), 2021-08-12

**Supplementary Table 1.** Baseline characteristics of the pilot study cohort of reproducibility and within-session repeatability.

| Characteristics                                     | MAFLD patients (N=50)    |
|-----------------------------------------------------|--------------------------|
| Age, years                                          | 44.3±10.5                |
| Male, n (%)                                         | 26 (52)                  |
| Body mass index (kg/m <sup>2</sup> )                | 24.6 ± 2.7               |
| Waist circumference, cm                             | 84.7 ± 7.5               |
| Waist hip ratio                                     | 0.88 ± 0.05              |
| Systolic blood pressure, mmHg                       | 126 ± 13                 |
| Diastolic blood pressure, mmHg                      | 84 ± 10                  |
| Alanine aminotransferase, U/L                       | 28 (15-53)               |
| Aspartate aminotransferase, U/L                     | 27 (19-37)               |
| γ-Glutamyl transpeptidase, U/L                      | 31 (21-63)               |
| Alkaline phosphatase, U/L                           | 80 (74-91)               |
| Total cholesterol, mmol/L                           | 5.05 ± 0.99              |
| Triglycerides, mmol/L                               | 2.13 ± 0.57              |
| HDL-C, mmol/L                                       | 1.18 ± 0.27              |
| LDL-C, mmol/L                                       | 3.19 ± 0.84              |
| Fasting blood glucose, mmol/L                       | 4.90 ± 0.74              |
| Fasting insulin, μU/mL <sup>†</sup>                 | 7.66 (5.65-10.84)        |
| HOMA-IR <sup>†</sup>                                | 1.57 (1.14-2.27)         |
| Uric acid, μmol/L                                   | 376 ± 112                |
| Liver fat content, %                                | 17.6 (7.7-25.6)          |
| Controlled attenuation parameter, dB/m <sup>†</sup> | 261 (243-280)            |
| Liver stiffness measurement, kPa <sup>†</sup>       | 5.4 (4.6-6.5)            |
| <b>Histological characteristics</b>                 |                          |
| Steatosis degree S0/S1/S2/S3, n (%)                 | 0(0)/20(40)/20(40)10(20) |
| Lobular inflammation L0/L1/L2/L3, n (%)             | 7(14)/38(76)/5(10)       |
| Ballooning B0/B1/B2, n (%)                          | 18(36)/30(60)/2(4)       |
| Fibrosis stage F0/F1/F2/F3/F4, n (%)                | 22(44)/23(46)/4(8)/1(2)  |

HDL-cholesterol, high-density lipoprotein-cholesterol; LDL-cholesterol, low-density lipoprotein-cholesterol; HOMA-IR, homeostasis model assessment of insulin resistance. <sup>†</sup>Continuous variables are expressed as median with IQR for non-Gaussian distribution.

**Supplementary Table 2.** Within-one-week reproducibility and within-session repeatability of CAP, MRI-PDFF and histology.

| <b>Parameter</b>                | <b>Slope</b>     | <b>Intercept</b>     | <b>ICC</b>       | <b>CV (%)</b>   |
|---------------------------------|------------------|----------------------|------------------|-----------------|
| <b>CAP</b>                      |                  |                      |                  |                 |
| Within-one-week reproducibility | 0.82 (0.75-0.88) | 36.04 (17.49-54.58)  | 0.88 (0.86-0.91) | 9.6 (7.9-11.3)  |
| Within-session repeatability    |                  |                      |                  |                 |
| Intraobserver                   | 0.93 (0.82-1.02) | 21.81 (-6.18-49.79)  | 0.94 (0.89-0.97) | 7.2 (5.7-8.8)   |
| Interobserver                   | 0.93 (0.71-1.14) | 15.70 (-12.55-50.57) | 0.87 (0.82-0.90) | 10.5 (8.2-12.8) |
| <b>MRI-PDFF</b>                 |                  |                      |                  |                 |
| Within-one-week reproducibility | 0.94 (0.86-1.01) | 0.64 (-0.65-1.94)    | 0.96 (0.94-0.98) | 5.7 (4.8-6.7)   |
| Within-session repeatability    |                  |                      |                  |                 |
| Intraobserver                   | 0.92 (0.86-1.00) | 0.25 (-0.96-1.46)    | 0.97 (0.95-0.98) | 4.8 (3.7-5.8)   |
| Interobserver                   | 0.94 (0.85-1.03) | 1.55 (-0.09-3.19)    | 0.94 (0.91-0.97) | 6.6 (5.2-7.9)   |
| <b>Histology</b>                |                  |                      |                  |                 |
| Within-one-week reproducibility | 1.03 (0.90-1.15) | 0.08 (-0.33-0.17)    | 0.96 (0.91-0.98) | 8.2 (5.2-11.2)  |
| Within-session repeatability    |                  |                      |                  |                 |
| Intraobserver                   | 0.92 (0.80-1.04) | 0.10 (-0.14-0.34)    | 0.95 (0.89-0.98) | 7.3 (4.8-9.9)   |
| Interobserver                   | 0.92 (0.78-1.05) | 0.08 (-0.20-0.36)    | 0.93 (0.86-0.97) | 9.0 (6.1-11.8)  |

Numbers in parentheses are 95% confidence intervals. CAP, controlled attenuation parameter; MRI-PDFF, magnetic resonance imaging-based proton density fat fraction; CV, coefficient of variation; ICC, intraclass correlation coefficient.

**Supplementary Table 3.** Diagnostic accuracy of steatosis with MRI-PDFF and CAP.

| Groups                                                             | AUC<br>(95% CI)        | <i>P</i> | Cutoff   | Sensitivity (%) | Specificity (%) | PPV (%)            | NPV (%)            |
|--------------------------------------------------------------------|------------------------|----------|----------|-----------------|-----------------|--------------------|--------------------|
| <b>Diagnostic accuracy at baseline using histology as standard</b> |                        |          |          |                 |                 |                    |                    |
| S0 vs S1-S3                                                        |                        |          |          |                 |                 |                    |                    |
| MRI-PDFF                                                           | 0.984<br>(0.915-0.999) | <0.001   | 5.5%     | 95              | 100             | 100.0 (95.5-100.0) | 71.4 (41.9-91.6)   |
| CAP                                                                | 0.972<br>(0.907-0.998) | <0.001   | 244 dB/m | 92              | 100             | 100 (93.8-100.0)   | 66.7 (38.4-88.2)   |
| S0-S1 vs S2-S3                                                     |                        |          |          |                 |                 |                    |                    |
| MRI-PDFF                                                           | 0.956<br>(0.883-0.992) | <0.001   | 14.6%    | 90              | 89              | 89.8 (77.8-96.6)   | 88.9 (75.9-96.3)   |
| CAP                                                                | 0.820<br>(0.710-0.901) | <0.001   | 265 dB/m | 88              | 69              | 71.4 (55.4-84.3)   | 87.1 (70.2-96.4)   |
| S0-S2 vs S3                                                        |                        |          |          |                 |                 |                    |                    |
| MRI-PDFF                                                           | 0.966<br>(0.893-0.995) | <0.001   | 24.3%    | 100             | 87              | 56.5 (34.5-76.8)   | 100.0 (94.9-100.0) |
| CAP                                                                | 0.815<br>(0.706-0.898) | <0.001   | 292 dB/m | 99              | 61              | 26.5 (12.9-44.4)   | 100.0 (91.0-100.0) |
| <b>Diagnostic accuracy at baseline using MRI-PDFF as standard</b>  |                        |          |          |                 |                 |                    |                    |
| S0 vs S1-S3                                                        |                        |          |          |                 |                 |                    |                    |
| CAP                                                                | 0.925<br>(0.872-0.960) | <0.001   | 245 dB/m | 75              | 100             | 100.0 (96.9-100.0) | 29.5 (22.7-42.6)   |
| S0-S1 vs S2-S3                                                     |                        |          |          |                 |                 |                    |                    |
| CAP                                                                | 0.846<br>(0.780-0.899) | <0.001   | 269 dB/m | 85              | 47              | 80.6 (71.1-88.1)   | 80.0 (68.2-88.9)   |
| S0-S2 vs S3                                                        |                        |          |          |                 |                 |                    |                    |
| CAP                                                                | 0.835<br>(0.768-0.889) | <0.001   | 291 dB/m | 72              | 95              | 80.0 (65.4-90.4)   | 84.7 (77.1-90.5)   |
| <b>Diagnostic accuracy at 6th month using MRI-PDFF as standard</b> |                        |          |          |                 |                 |                    |                    |
| S0 vs S1-S3                                                        |                        |          |          |                 |                 |                    |                    |

|                                                                 |                                                               |                        |        |          |    |    |                  |                  |
|-----------------------------------------------------------------|---------------------------------------------------------------|------------------------|--------|----------|----|----|------------------|------------------|
|                                                                 | CAP                                                           | 0.928<br>(0.876-0.963) | <0.001 | 248 dB/m | 89 | 81 | 95.4 (90.2-98.3) | 53.1 (34.7-70.9) |
| S0-S1 vs S2-S3                                                  |                                                               |                        |        |          |    |    |                  |                  |
|                                                                 | CAP                                                           | 0.857<br>(0.793-0.908) | <0.001 | 270 dB/m | 78 | 82 | 68.9 (55.7-80.1) | 87.6 (79.4-93.4) |
| S0-S2 vs S3                                                     |                                                               |                        |        |          |    |    |                  |                  |
|                                                                 | CAP                                                           | 0.842<br>(0.776-0.895) | <0.001 | 289 dB/m | 75 | 92 | 56.4 (39.6-72.2) | 94.1 (88.3-97.6) |
| <b>Diagnostic value at follow-up using MRI-PDFF as standard</b> |                                                               |                        |        |          |    |    |                  |                  |
|                                                                 | MRI-PDFF changes $\geq 5\%$ predicted by CAP changes          | 0.685<br>(0.606-0.757) | <0.001 | 16 dB/m  | 80 | 49 | 47.4 (37.2-57.8) | 81.7 (69.6-90.5) |
|                                                                 | MRI-PDFF changes $\geq 10\%$ predicted by CAP changes         | 0.704<br>(0.626-0.773) | 0.001  | 33 dB/m  | 57 | 84 | 45.9 (29.5-63.1) | 89.3 (82.3-94.2) |
|                                                                 | MRI-PDFF steatosis grade improvement predicted by CAP changes | 0.717<br>(0.638-0.788) | <0.001 | -15 dB/m | 69 | 66 | 59.0 (47.7-69.7) | 77.9 (66.2-87.1) |
|                                                                 | MRI-PDFF steatosis stage worsening predicted by CAP changes   | 0.685<br>(0.599-0.792) | 0.003  | 16 dB/m  | 56 | 81 | 23.8 (8.2-47.2)  | 94.5 (86.6-98.5) |

MRI-PDFF, magnetic resonance imaging-based proton density fat fraction; CAP, controlled attenuation parameter

**Supplementary Table 4.** Grade changes defined by CAP and the corresponding changes of CAP and MRI-PDFF.

| Steatosis grade defined by CAP |              |              |           |                      |                      |                      |                       |
|--------------------------------|--------------|--------------|-----------|----------------------|----------------------|----------------------|-----------------------|
| At baseline                    | At 6th month | Grade change | N=158     | $\Delta$ CAP>16 dB/m | $\Delta$ CAP>33 dB/m | $\Delta$ MRI-PDFF>5% | $\Delta$ MRI-PDFF>10% |
| 3                              | 0            | -3           | 3 (1.9%)  | 3(1.9%)              | 3(1.9%)              | 2(1.3%)              | 2(1.3%)               |
| 3                              | 1            | -2           | 4(2.5%)   | 4(2.5%)              | 4(2.5%)              | 4(2.5%)              | 3(1.9%)               |
| 2                              | 0            | -2           | 7(4.4%)   | 7(4.4%)              | 5(3.2%)              | 4(2.5%)              | 2(1.3%)               |
| 3                              | 2            | -1           | 18(11.4%) | 17(10.8%)            | 11(7.0%)             | 14(8.9%)             | 11(7.0%)              |
| 2                              | 1            | -1           | 38(24.1%) | 25(15.8%)            | 6(3.8%)              | 18(11.4%)            | 6(3.8%)               |
| 1                              | 0            | -1           | 8(5.1%)   | 6(3.8%)              | 0(0%)                | 0(0%)                | 0(0%)                 |
| 3                              | 3            | 0            | 13(8.2%)  | 9(5.7%)              | 2(1.3%)              | 8(5.0%)              | 2(1.3%)               |
| 2                              | 2            | 0            | 30(19.0)  | 7(4.4%)              | 0(0%)                | 7(4.4%)              | 2(1.3%)               |
| 1                              | 1            | 0            | 13(8.2%)  | 0 (0%)               | 0(0%)                | 1(0.6%)              | 0(0%)                 |
| 0                              | 0            | 0            | 2(1.3%)   | 0(0%)                | 0(0%)                | 1(0.6%)              | 0(0%)                 |
| 2                              | 3            | 1            | 11(7.0%)  | 11(7.0%)             | 6(3.8%)              | 2(1.3%)              | 0(0%)                 |
| 1                              | 2            | 1            | 7(4.4%)   | 4(2.5%)              | 0(0%)                | 1(0.6%)              | 1(0.6%)               |
| 0                              | 1            | 1            | 3(1.9%)   | 3(1.9%)              | 0(0%)                | 0(0%)                | 0(0%)                 |
| 0                              | 2            | 2            | 1(0.6%)   | 1(0.6%)              | 1(0.6%)              | 1(0.6%)              | 1(0.6%)               |

# Supplementary Figure 1.

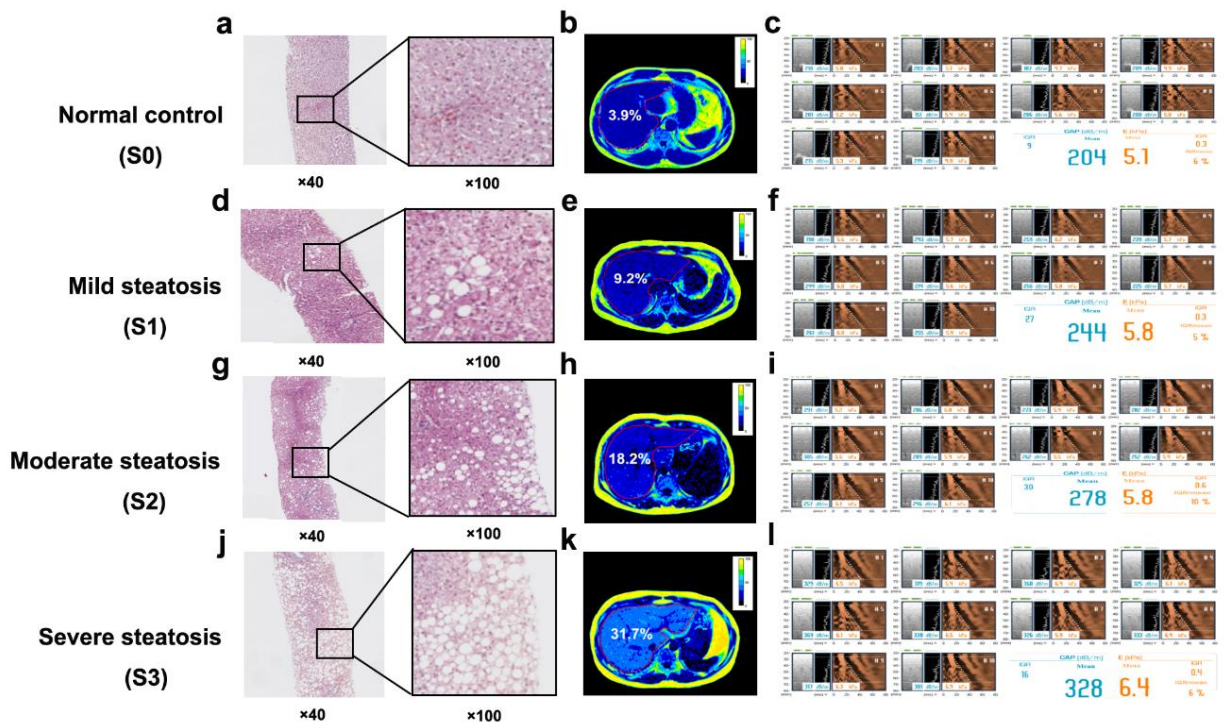

Supplementary Figure 2.

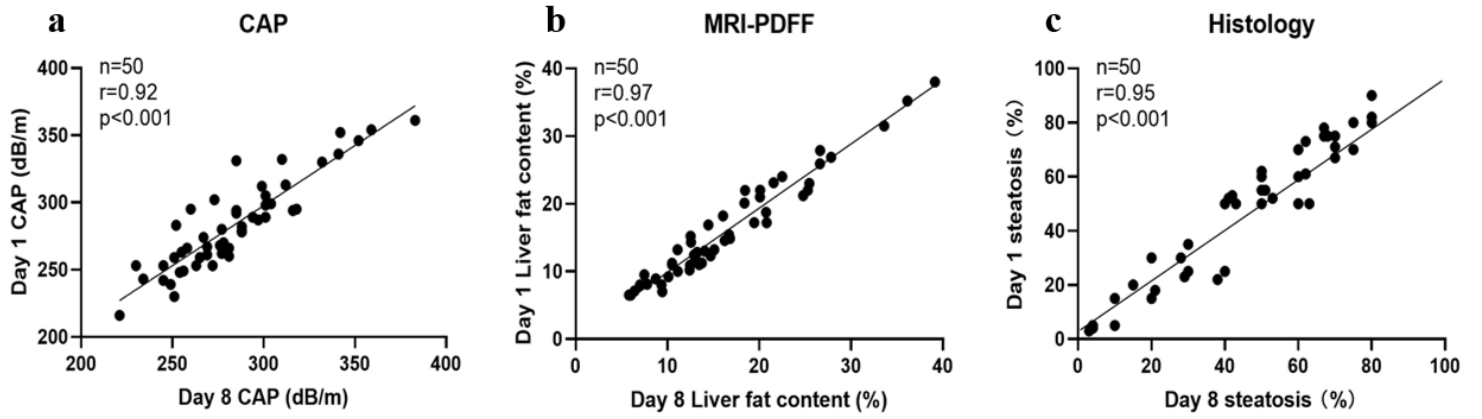

### Supplementary Figure 3.

**a**

CAP for steatosis graded by MRI-PDFF at baseline

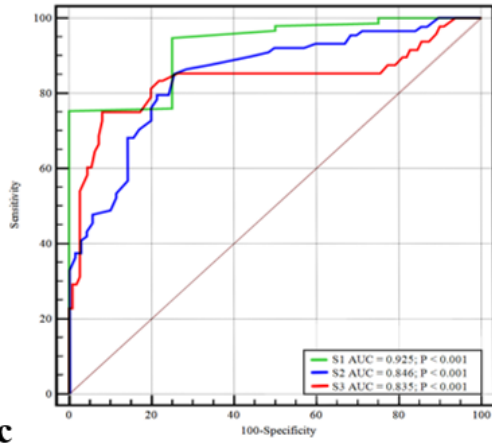

**b**

CAP for steatosis graded by MRI-PDFF at 6th month

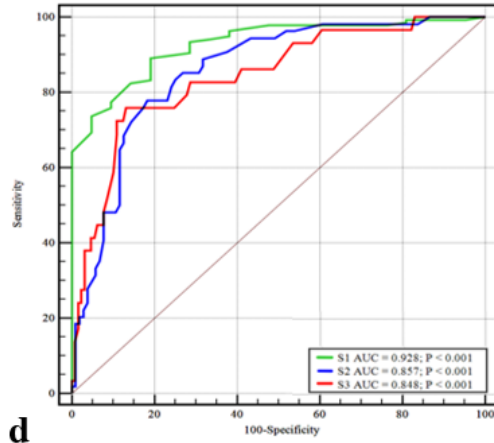

**c**

$\Delta$  CAP for  $\Delta$  MRI-PDFF  $\geq 5\%$  remaining in the same steatosis grade

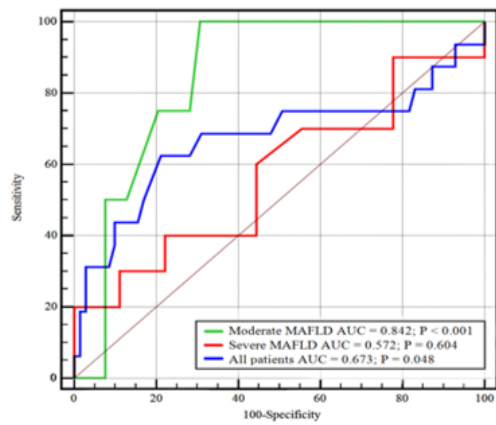

**d**

$\Delta$  CAP for  $\Delta$  MRI-PDFF  $\geq 10\%$  remaining in the same steatosis grade

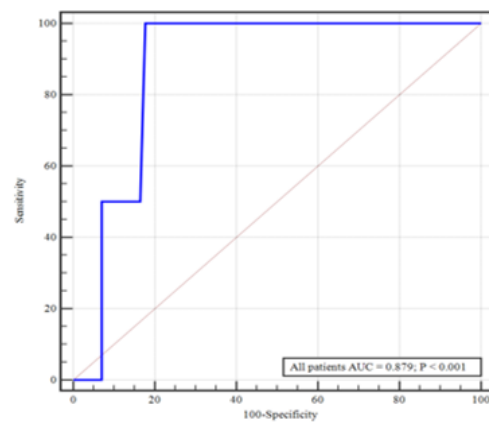

Supplement: sj-pdf-2-taj-10.1177_20406223211033119.pdf [file sj-pdf-2-taj-10.1177_20406223211033119.pdf]
